# Supplementary material for: Dragon TIS Spotter: an Arabidopsis-derived predictor of translation initiation sites in plants
Source: PubMed Central journal article supplement (PMC3530916; doi:10.1093/bioinformatics/bts638), 2012-10-30
Supplement: supp_bts638_Supplementary_Material_2.pdf [file supp_bts638_Supplementary_Material_2.pdf]

---

## Application Note

### DRAGON TIS SPOTTER: AN ARABIDOPSIS-DERIVED PREDICTOR OF TRANSLATION INITIATION SITES WITHIN GENOMIC DNA SEQUENCE IN PLANTS

Arturo M. Mora<sup>1,\*</sup>, Haitham Ashoor<sup>1,\*</sup>, Boris R. Jankovic<sup>1,\*</sup>, Allan Kamau<sup>1</sup>, Karim Awara<sup>1</sup>, Rajesh Chowdhary<sup>2</sup>, John A.C. Archer<sup>1</sup>, Vladimir B. Bajic<sup>1,§</sup>

<sup>1</sup>King Abdullah University of Science and Technology (KAUST), Computational Bioscience Research Center, Thuwal 23955-6900, Saudi Arabia.

<sup>2</sup> Biomedical Informatics Research Center, MCRF, Marshfield Clinic, 1000 North Oak Avenue, Marshfield, WI 54449, USA

\*These authors contributed equally to this work

§Corresponding author: vladimir.bajic@kaust.edu.sa

---

### SUPPLEMENTARY MATERIAL 2: LIST OF FEATURES USED IN DRAGON TIS SPOTTER FOR ARABIDOPSIS THALIANA

The following table provides a list of all features used in Dragon TIS Spotter for plants. The names given to the features correspond to the names of features as used in the programs implementing the tool. Features are derived from Arabidopsis data sets.

|                    |                                                                                                     |
|--------------------|-----------------------------------------------------------------------------------------------------|
| pscore             | Positive score value calculated based on PWM                                                        |
| nscore             | Negative score value calculated based on PWM                                                        |
| kozak              | Binary value indicating the conservation of the consensus GCC[A/G]CCatgG                            |
| G_ratio            | Number of G nucleotides in the 20 upstream positions with the highest information gain              |
| UpstreamATGin      | In-frame ATG codon frequency in the upstream segment                                                |
| UpstreamATGout     | Out-frame ATG codon frequency in the upstream segment                                               |
| Num_ATG            | ATG codon frequency in both upstream and downstream segments                                        |
| putative_sequence  | "Binary value that indicates whether the sequence contains an in-frame stop codon (TAG TAA or TGA)" |
| Info_gain          | Information gain value calculated based on the entropy of the nucleotides in the sequence           |
| u_kth1_a           | Frequency of nucleotide A in position 1 in the in-frame codons for the upstream segment             |
| u_kth2_a           | Frequency of nucleotide A in position 2 in the in-frame codons for the upstream segment             |
| u_kth3_a           | Frequency of nucleotide A in position 3 in the in-frame codons for the upstream segment             |
| u_kth2_c           | Frequency of nucleotide C in position 2 in the in-frame codons for the upstream segment             |
| u_kth3_c           | Frequency of nucleotide C in position 3 in the in-frame codons for the upstream segment             |
| u_kth2_g           | Frequency of nucleotide G in position 2 in the in-frame codons for the upstream segment             |
| u_kth2_t           | Frequency of nucleotide T in position 2 in the in-frame codons for the upstream segment             |
| d_kth1_a           | Frequency of nucleotide A in position 1 in the in-frame codons for the downstream segment           |
| d_kth2_g           | Frequency of nucleotide G in position 2 in the in-frame codons for the downstream segment           |
| d_kth2_t           | Frequency of nucleotide T in position 2 in the in-frame codons for the downstream segment           |
| upstream_a         | 1-gram feature: frequency of A nucleotide in the upstream segment                                   |
| upstream_c         | 1-gram feature: frequency of C nucleotide in the upstream segment                                   |
| upstream_t         | 1-gram feature: frequency of T nucleotide in the upstream segment                                   |
| downstream_a       | 1-gram feature: frequency of A nucleotide in the downstream segment                                 |
| downstream_c       | 1-gram feature: frequency of C nucleotide in the downstream segment                                 |
| downstream_g       | 1-gram feature: frequency of G nucleotide in the downstream segment                                 |
| downstream_t       | 1-gram feature: frequency of T nucleotide in the downstream segment                                 |
| upstream_2mer_aa   | 2-gram feature: frequency of AA dinucleotides in the upstream segment                               |
| upstream_2mer_ac   | 2-gram feature: frequency of AC dinucleotides in the upstream segment                               |
| upstream_2mer_at   | 2-gram feature: frequency of AT dinucleotides in the upstream segment                               |
| upstream_2mer_ca   | 2-gram feature: frequency of CA dinucleotides in the upstream segment                               |
| upstream_2mer_cg   | 2-gram feature: frequency of CG dinucleotides in the upstream segment                               |
| upstream_2mer_gc   | 2-gram feature: frequency of GC dinucleotides in the upstream segment                               |
| upstream_2mer_gt   | 2-gram feature: frequency of GT dinucleotides in the upstream segment                               |
| upstream_2mer_tt   | 2-gram feature: frequency of TT dinucleotides in the upstream segment                               |
| downstream_2mer_ag | 2-gram feature: frequency of AG dinucleotides in the downstream segment                             |

|                    |                                                                                                                                            |
|--------------------|--------------------------------------------------------------------------------------------------------------------------------------------|
| downstream_2mer_at | 2-gram feature: frequency of AT dinucleotides in the downstream segment                                                                    |
| downstream_2mer_ca | 2-gram feature: frequency of CA dinucleotides in the downstream segment                                                                    |
| downstream_2mer_cc | 2-gram feature: frequency of CC dinucleotides in the downstream segment                                                                    |
| downstream_2mer_cg | 2-gram feature: frequency of CG dinucleotides in the downstream segment                                                                    |
| downstream_2mer_ct | 2-gram feature: frequency of CT dinucleotides in the downstream segment                                                                    |
| downstream_2mer_gc | 2-gram feature: frequency of GC dinucleotides in the downstream segment                                                                    |
| downstream_2mer_gg | 2-gram feature: frequency of GG dinucleotides in the downstream segment                                                                    |
| downstream_2mer_gt | 2-gram feature: frequency of GT dinucleotides in the downstream segment                                                                    |
| downstream_2mer_tg | 2-gram feature: frequency of TG dinucleotides in the downstream segment                                                                    |
| upstream DMF       | Accumulative frequency of the 20 most common motifs in the upstream segment                                                                |
| downstream DMF     | Accumulative frequency of the 20 most common motifs in the downstream segment                                                              |
| middle DMF         | Accumulative frequency of the 20 most common motifs in the segment around the candidate TIS<br>(50 nucleotides downstream and 50 upstream) |
